# Supplementary material for: Gas6/TAM system as potential biomarker for multiple sclerosis prognosis
Source: PubMed Central journal article supplement (PMC11091300; doi:10.3389/fimmu.2024.1362960), 2024-04-30
Supplement: DataSheet_1.pdf [file DataSheet_1.pdf]

Supplementary Materials.

**Table 1.** Correlation between serum and CSF concentrations of Gas6 and its receptor.

|               | Serum and CSF concentrations |                 |
|---------------|------------------------------|-----------------|
| Variables     | Correlation Coefficient      | <i>p</i> -Value |
| Gas 6 (ng/mL) | 0.13                         | 0.31            |
| sAXL (ng/mL)  | 0.30                         | <b>0.02</b>     |
| sMER (ng/mL)  | -                            | -               |

*MS course and MRI features at diagnosis.*

We compared the RIS-CIS population to those patients with RRMS and found higher sMer and sTyro-3 serum levels at the diagnosis in the RIS-CIS subgroup (**Figure 1**). No statistically significant results were found in CSF.

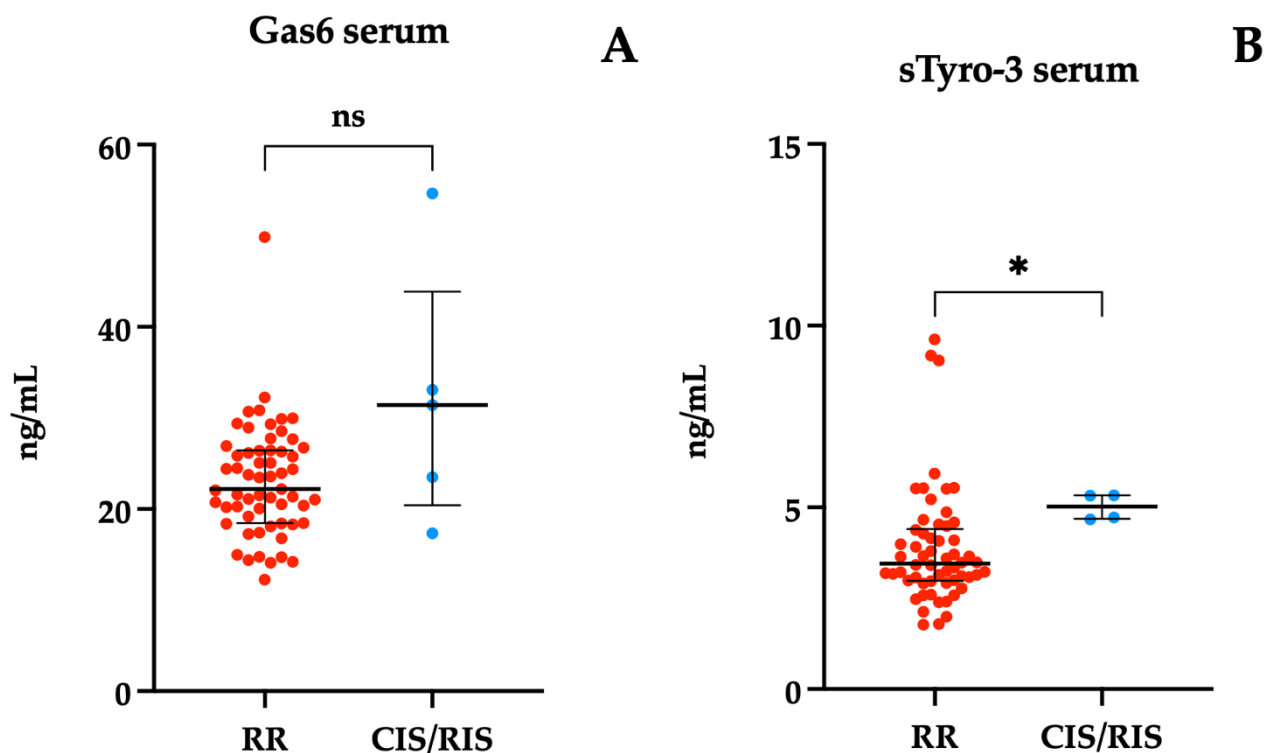

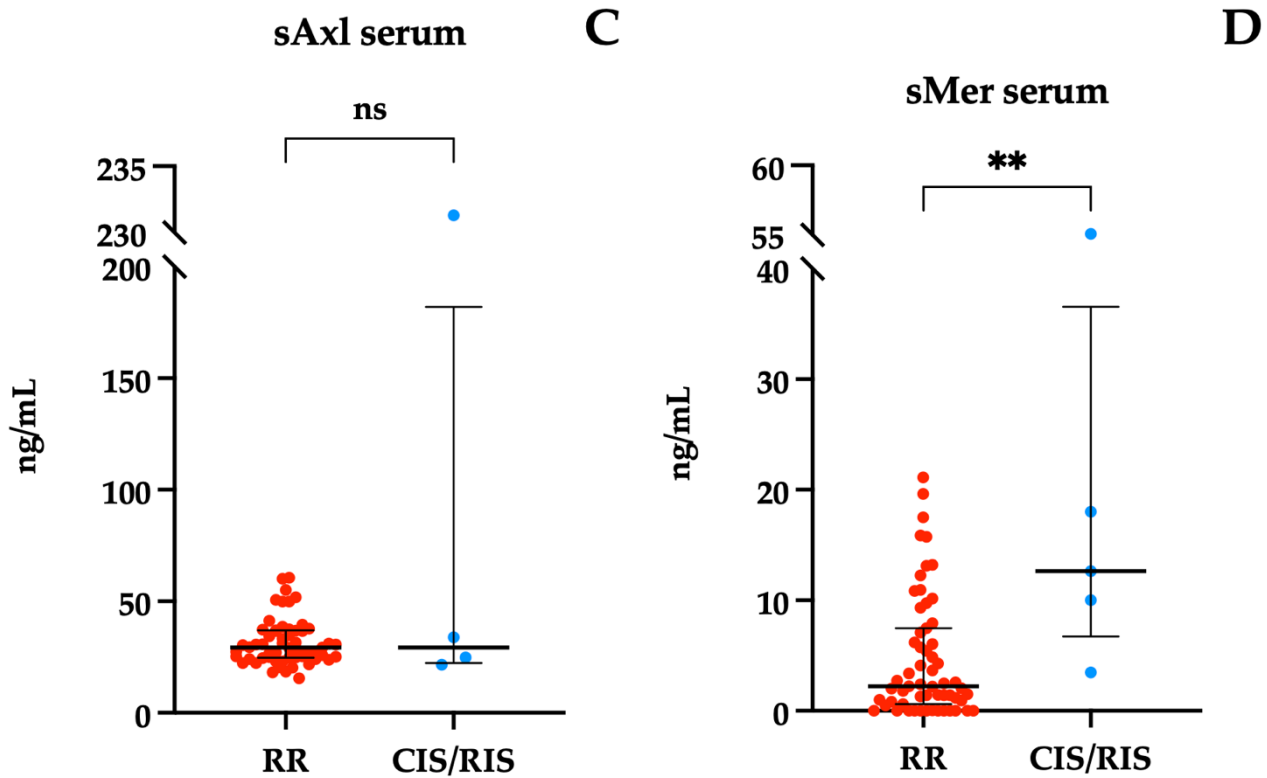

**Figure 1.** Association between Gas6 (A) and TAMs receptors (B, C, D) concentrations in serum with the different types of MS. RR = relapsing and remitting, RIS = Radiological Isolated Syndrome and CIS = Clinical Isolated Syndrome. Results are shown as medians [IQR]. \*  $p = 0.018$  and \*\*  $p = 0.007$ , ns = not significant.

**Table 2.** The table shows the associations between Gas6 and TAM receptor and T2 brain, spinal and gadolinium-enhancing lesions. Values are expressed as median [IQR]. N, number of patients.

|                       | Brain lesions <10 N = 28 | Brain lesions >10 N = 36 |        |         |
|-----------------------|--------------------------|--------------------------|--------|---------|
| Variables             | Median [IQR]             | Median [IQR]             | Z      | p-Value |
| Gas 6 Serum (ng/mL)   | 22.84 [19.25 - 26.56]    | 23.71 [18.82 - 27.72]    | -0.162 | 0.88    |
| Gas6 CSF (ng/mL)      | 6.97 [4.97 - 10.24]      | 8.07 [5.05 - 10.41]      | -0.436 | 0.67    |
| sAXL Serum (ng/mL)    | 31.19 [24.59 - 37.72]    | 27.27 [24.77 - 33.64]    | 0.899  | 0.38    |
| sAXL CSF (ng/mL)      | 22.91 [17.32 - 31.52]    | 29.70 [22.45 - 32.97]    | -1.438 | 0.15    |
| sMER Serum (ng/mL)    | 2.20 [0.01 - 7.53]       | 2.94 [1.45 - 10.89]      | -1.392 | 0.17    |
| sTyro-3 Serum (ng/mL) | 1.72 [3.01 - 4.72]       | 1.29 [2.99 - 4.28]       | 0.62   | 0.54    |
| sTyro-3 CSF (ng/mL)   | 1.62 [2.92 - 4.54]       | 1.90 [3.02 - 4.75]       | -0.97  | 0.33    |

|                       | <b>Spinal lesions &lt;10 N = 21</b> | <b>Spinal lesions &gt;10 N = 43</b> |          |                |
|-----------------------|-------------------------------------|-------------------------------------|----------|----------------|
| <b>Variables</b>      | <b>Median [IQR]</b>                 | <b>Median [IQR]</b>                 | <b>Z</b> | <b>p-Value</b> |
| Gas 6 Serum (ng/mL)   | 23.50 [18.45 – 29.89]               | 23.48 [19.20 - 26.39]               | 0.636    | 0.22           |
| Gas6 CSF (ng/mL)      | 8.83 [6.43 - 10.10]                 | 7.43 [4.82 - 10.94]                 | 0.773    | 0.45           |
| sAXL Serum (ng/mL)    | 30.03 [21.97 – 35.68]               | 29.04 [24.83 – 36.89]               | -0.286   | 0.78           |
| sAXL CSF (ng/mL)      | 23.64 [17.07 - 31.55]               | 26.71 [21.40 – 32.97]               | -0.818   | 0.42           |
| sMER Serum (ng/mL)    | 3.66 [1.19 - 10.01]                 | 2.23 [0.81 – 7.47]                  | 0.746    | 0.46           |
| sTyro-3 Serum (ng/mL) | 1.96 [3.06 – 5.02]                  | 1.09 [2.98 – 4.08]                  | 1.68     | 0.09           |
| sTyro-3 CSF (ng/mL)   | 1.43 [3.28 – 4.72]                  | 1.86 [2.96 – 4.82]                  | 0.57     | 0.57           |

|                       | <b>Gadolinium enhancing Lesion – N = 25</b> | <b>Gadolinium enhancing Lesion + N = 39</b> |          |                |
|-----------------------|---------------------------------------------|---------------------------------------------|----------|----------------|
| <b>Variables</b>      | <b>Median [IQR]</b>                         | <b>Median [IQR]</b>                         | <b>Z</b> | <b>p-Value</b> |
| Gas 6 Serum (ng/mL)   | 23.48 [18.32 - 26.39]                       | 23.50 [20.05 – 27.68]                       | -0.117   | 0.91           |
| Gas6 CSF (ng/mL)      | 7.39 [5.20 – 9.15]                          | 8.27 [5.05 - 10.41]                         | -0.478   | 0.64           |
| sAXL Serum (ng/mL)    | 30.68 [26.27 – 37.30]                       | 26.83 [23.85 - 36.70]                       | 1.561    | 0.12           |
| sAXL CSF (ng/mL)      | 24.49 [18.87 - 32.19]                       | 29.32 [21.76 – 32.52]                       | -0.850   | 0.40           |
| sMER Serum (ng/mL)    | 3.47 [0.81 - 10.00]                         | 2.50 [0.95 – 9.32]                          | 0.207    | 0.84           |
| sTyro-3 Serum (ng/mL) | 1.67 [3.13 – 4.79]                          | 1.31 [2.97 – 4.28]                          | 0.74     | 0.46           |
| sTyro-3 CSF (ng/mL)   | 1.69 [3.14 – 4.82]                          | 1.43 [3.02 – 4.45]                          | 0.60     | 0.55           |

**Table 3.** Association between biomarker and type of treatment at first visit

|                     | No treatment          | 1° line               | 2° line               |          |                 |
|---------------------|-----------------------|-----------------------|-----------------------|----------|-----------------|
| Variables           | Median [IQR]          | Median [IQR]          | Median [IQR]          | $\chi^2$ | <i>p</i> -Value |
| Gas 6 Serum (ng/mL) | 20.19 [17.32 – 33.07] | 23.50 [20.05 – 26.92] | 23.06 [19.73 – 26.01] | 0.699    | 0.70            |
| Gas6 CSF (ng/mL)    | 5.20 [4.38 – 10.20]   | 7.68 [5.23 – 10.61]   | 8.81 [4.86 – 10.03]   | 0.299    | 0.86            |
| sAXL Serum (ng/mL)  | 30.31 [24.76 – 36.64] | 31.11 [25.35 – 37.72] | 25.19 [23.04 – 30.38] | 4.790    | 0.09            |
| sAXL CSF (ng/mL)    | 25.20 [16.01 – 29.32] | 26.38 [17.35 – 32.97] | 26.04 [22.70 – 32.51] | 0.366    | 0.83            |
| sMER Serum (ng/mL)  | 3.47 [2.50 – 10.01]   | 1.82 [0.03 – 9.32]    | 3.07 [1.46 – 8.84]    | 1.882    | 0.39            |

**Table 4.** Association between biomarker and type of treatment at follow – up

|                     | No treatment          | 1° line               | 2° line               |          |                 |
|---------------------|-----------------------|-----------------------|-----------------------|----------|-----------------|
| Variables           | Median [IQR]          | Median [IQR]          | Median [IQR]          | $\chi^2$ | <i>p</i> -Value |
| Gas 6 Serum (ng/mL) | 24.79 [17.32 – 33.07] | 23.52 [20.05 – 26.92] | 21.77 [18.82 – 25.18] | 0.034    | 0.98            |
| Gas6 CSF (ng/mL)    | 7.20 [5.18 – 10.20]   | 7.68 [5.12 – 10.94]   | 8.08 [4.28 – 9.38]    | 0.542    | 0.76            |
| sAXL Serum (ng/mL)  | 34.71 [24.76 – 36.64] | 30.70 [25.35 – 37.44] | 25.27 [23.88 – 29.79] | 6.285    | <b>0.04</b>     |
| sAXL CSF (ng/mL)    | 27.66 [22.75 – 29.32] | 25.04 [17.35 – 32.24] | 26.38 [21.76 – 32.52] | 0.704    | 0.70            |
| sMER Serum (ng/mL)  | 3.03 [2.50 – 10.01]   | 2.10 [0.03 – 9.32]    | 4.57 [1.46 – 8.84]    | 1.723    | 0.42            |

**Table 5.** We performed Mann Whitney U test between Gas6 and TAM receptor and the different clinical marker of severity of disease. Statistically significant results are evidenced in bold text.

|                     | EDSS 1° visit < 3 N = 55 | EDSS 1° visit > 3 N = 9 |        |              |
|---------------------|--------------------------|-------------------------|--------|--------------|
| Variables           | Median [IQR]             | Median [IQR]            | Z      | p-Value      |
| Gas 6 Serum (ng/mL) | 23.57 [20.05 – 26.92]    | 20.61 [17.26 – 24.50]   | 1.265  | 0.21         |
| Gas6 CSF (ng/mL)    | 8.08 [5.20 – 10.41]      | 4.60 [3.29 – 7.48]      | 2.043  | <b>0.04</b>  |
| sAXL Serum (ng/mL)  | 30.63 [24.71 – 37.30]    | 25.27 [23.98 – 26.50]   | 2.079  | <b>0.037</b> |
| sAXL CSF (ng/mL)    | 26.71 [21.75 – 32.50]    | 21.76 [17.07 – 31.31]   | 0.844  | 0.41         |
| sMER Serum (ng/mL)  | 2.50 [0.61 – 9.32]       | 2.74 [1.30 – 9.76]      | -0.058 | 0.96         |

|                     | EDSS 2° visit < 3 N = 57 | EDSS 2° visit > 3 N = 9 |        |         |
|---------------------|--------------------------|-------------------------|--------|---------|
| Variables           | Median [IQR]             | Median [IQR]            | Z      | p-Value |
| Gas 6 Serum (ng/mL) | 23.50 [20.05 – 26.92]    | 20.26 [18.31 – 26.15]   | 0.656  | 0.53    |
| Gas6 CSF (ng/mL)    | 7.78 [5.19 – 10.15]      | 4.60 [2.88 – 15.84]     | 0.481  | 0.64    |
| sAXL Serum (ng/mL)  | 29.33 [24.65 – 36.79]    | 27.82 [24.93 – 49.94]   | -0.071 | 0.95    |
| sAXL CSF (ng/mL)    | 26.72 [21.40 – 32.48]    | 21.76 [15.90 – 42.92]   | 0.577  | 0.57    |
| sMER Serum (ng/mL)  | 2.41 [0.81 – 9.32]       | 3.39 [1.42 – 9.76]      | -0.367 | 0.72    |

**Table 6.** We performed Spearman’s correlation between Gas6 and TAM receptor and MSSS. Statistically significant results are evidenced in bold text.

|                       | MSSS                    |             |
|-----------------------|-------------------------|-------------|
| Laboratory Parameters | Correlation Coefficient | p-Value     |
| Gas 6 Serum (ng/mL)   | -0.3180                 | <b>0.01</b> |
| Gas6 CSF (ng/mL)      | -0.1861                 | 0.14        |
| sAXL Serum (ng/mL)    | -0.0519                 | 0.69        |
| sAXL CSF (ng/mL)      | -0.0207                 | 0.87        |
| sMER Serum (ng/mL)    | 0.0251                  | 0.84        |

**Table 7.** We performed Spearman’s correlation between Gas6 and TAM receptor and ARMSS.

|                       | ARMSS                   |         |
|-----------------------|-------------------------|---------|
| Laboratory Parameters | Correlation Coefficient | p-Value |
| Gas 6 Serum (ng/mL)   | -0.2146                 | 0.08    |
| Gas6 CSF (ng/mL)      | 0.0436                  | 0.73    |
| sAXL Serum (ng/mL)    | 0.0142                  | 0.91    |
| sAXL CSF (ng/mL)      | 0.0473                  | 0.72    |
| sMER Serum (ng/mL)    | -0.0386                 | 0.76    |

In **Figure 2** are shown the Spearman's correlation between Gas6 and TAM receptor and ARMSS.

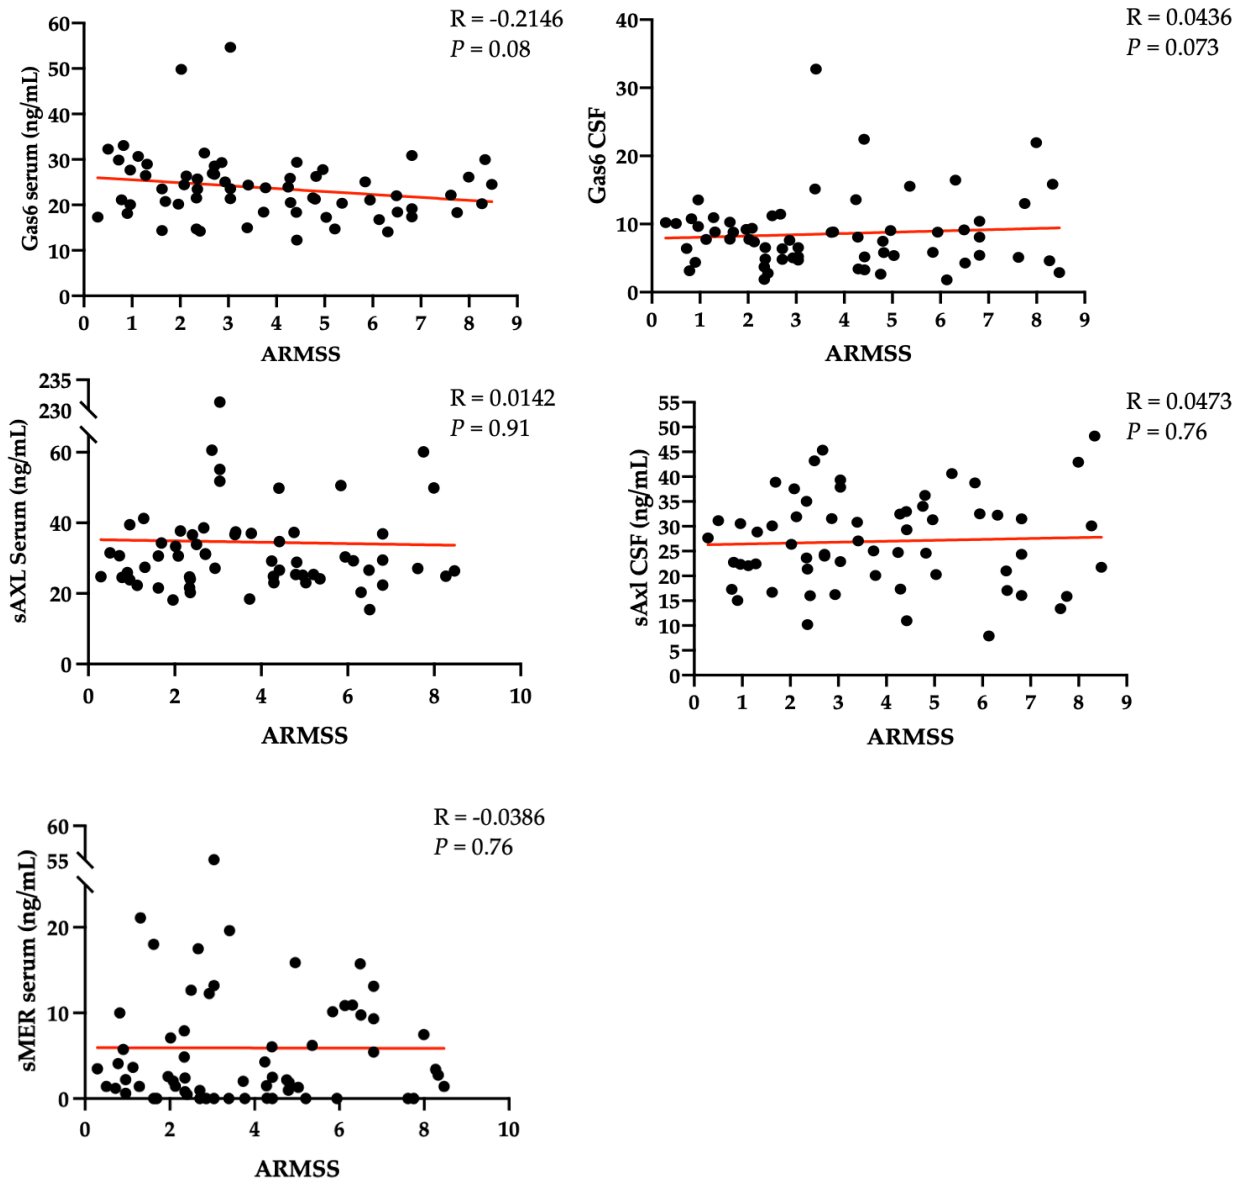

Figure 2. Spearman's correlation between Gas6 and TAM receptors in serum and CSF ARMSS. R = coefficient of correlation,  $P = p$ -Value

**Table 8.** We performed multivariate analysis the different types of MS.

| Predictor              | Coefficient | Standard error | <i>p</i> - value | 95% confidence interval |
|------------------------|-------------|----------------|------------------|-------------------------|
| Gas6 serum (ng/ml)     | -0.00004    | 0.0053         | 0.99             | -0.0106 – -0.0105       |
| sAXL serum (ng/ml)     | -0.0029     | 0.0029         | 0.32             | -0.0090 – 0.0030        |
| sMer serum (ng/ml)     | 0.0075      | 0.0054         | 0.16             | -0.0033 – 0.0184        |
| sTyro- 3 serum (ng/mL) | 0.0157      | 0.0208         | 0.45             | -0.0261 – 0.0576        |
| NFL serum (pg/mL)      | 0.00005     | 0.0008         | 0.95             | -0.0016 – 0.0017        |
| Age                    | 0.0009      | 0.0032         | 0.77             | -0.0055 – 0.0073        |
| Sex                    | -0.0424     | 0.0663         | 0.52             | -0.1757 – 0.0907        |
| N° brain lesion >10    | -0.0517     | 0.0628         | 0.41             | -0.1780 – 0.0745        |
| N° spinal lesion >10   | -0.0415     | 0.0656         | 0.53             | -0.1735 – 0.0905        |
| Gadolinium-enhancing   | -0.0595     | 0.0638         | 0.35             | -0.1878 – 0.0687        |

**Table 9.** We performed multivariate analysis for DMTs first line.

| Predictor              | Coefficient | Standard error | <i>p</i> - value | 95% confidence interval |
|------------------------|-------------|----------------|------------------|-------------------------|
| Gas6 serum (ng/ml)     | -0.0008     | 0.0125         | 0.94             | -0.0260 – 0.0243        |
| sAXL serum (ng/ml)     | -0.0087     | 0.0070         | 0.22             | -0.0230 – 0.0055        |
| sMer serum (ng/ml)     | 0.0158      | 0.0128         | 0.22             | -0.0099 – 0.0415        |
| sTyro- 3 serum (ng/mL) | 0.0153      | 0.0493         | 0.75             | -0.0837 – 0.1145        |
| NFL serum (pg/mL)      | 0.0037      | 0.0019         | 0.059            | -0.0001 – 0.0077        |
| Age                    | -0.0177     | 0.0076         | <b>0.024</b>     | -0.0329 – -0.0024       |
| Sex                    | -0.0331     | 0.1569         | 0.83             | -0.3484 – 0.2822        |
| N° brain lesion >10    | 0.3474      | 0.1487         | <b>0.024</b>     | 0.0485 – 0.6463         |
| N° spinal lesion >10   | 0.2401      | 0.1554         | 0.12             | -0.0723 – 0.5524        |
| Gadolinium-enhancing   | 0.0557      | 0.1511         | 0.71             | -0.2478 – 0.3594        |
